# Supplementary material for: A saposin deficiency model in Drosophila: Lysosomal storage, progressive neurodegeneration and sensory physiological decline
Source: PubMed Central journal article supplement (PMC5319729; doi:10.1016/j.nbd.2016.11.012), 2017-02

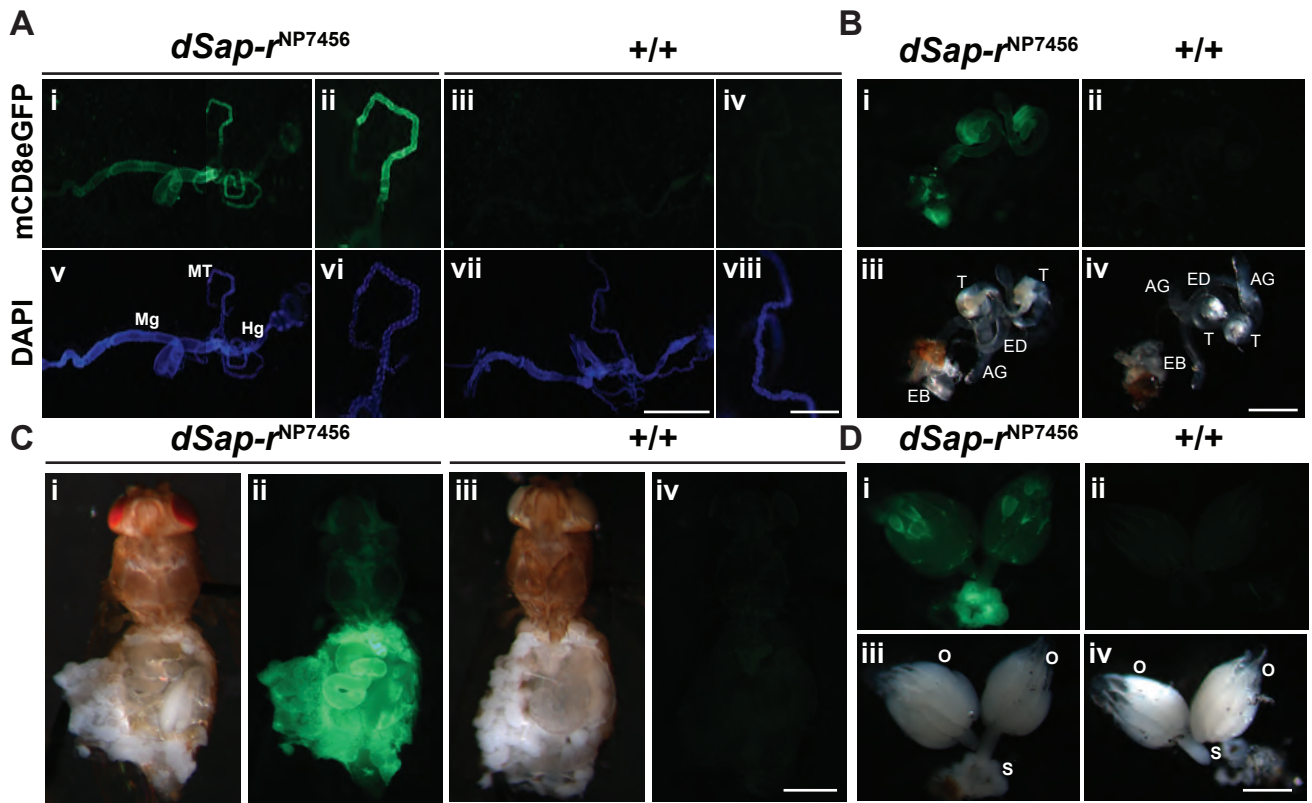

Supplement: mmc1.pdf [file mmc1.pdf]
