# Supplementary material for: A saposin deficiency model in Drosophila: Lysosomal storage, progressive neurodegeneration and sensory physiological decline
Source: PubMed Central journal article supplement (PMC5319729; doi:10.1016/j.nbd.2016.11.012), 2017-02

**+/+**

***dSap-r<sup>C27</sup>/Df***

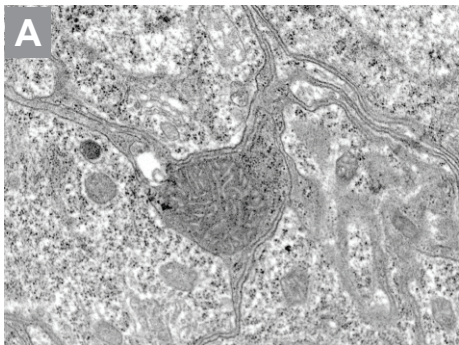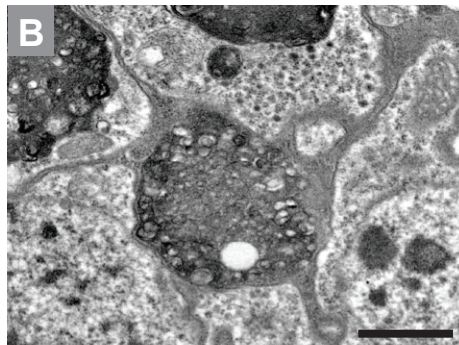

Supplement: mmc2.pdf [file mmc2.pdf]
