# Supplementary material for: A saposin deficiency model in Drosophila: Lysosomal storage, progressive neurodegeneration and sensory physiological decline
Source: PubMed Central journal article supplement (PMC5319729; doi:10.1016/j.nbd.2016.11.012), 2017-02
Supplement: mmc3.pdf [file mmc3.pdf]

### Supplemental Fig. 1

***dSap-r* is expressed in visceral organs of *Drosophila*.** Digestive systems (A), male (B) and female (D) reproductive systems and fat bodies (C) are shown from adult controls (+/+) and flies expressing mCD8eGFP under the control of *dSap-r*<sup>NP7456</sup> GAL4. Organs are stained with the nuclear marker DAPI in (A). MT, Malpighian tubule; Mg, midgut; Hg, hindgut; T, testes; EB, ejaculatory bulb; AG, accessory gland; ED, ejaculatory duct; O, ovary; S, spermatheca. Scale bars: (A) 1000  $\mu\text{m}$  (vii) and 250  $\mu\text{m}$  (viii), (B-D) 500  $\mu\text{m}$ .

### Supplemental Fig. 2

#### Cell enlargement and increased storage in *dSap-r*<sup>C27</sup>/Df mutant glia.

Transmission electron micrographs of glia surrounding the antennal lobe of 22-day old wild type (+/+; A) and *dSap-r*<sup>C27</sup>/Df mutant (B) brains (n = 3). Electron-dense and electron-lucent vesicular storage is shown in *dSap-r*<sup>C27</sup>/Df mutant glia (B). Scale bar: 1  $\mu\text{m}$ .

### Supplemental Table 1: Internal Standard (IS) mix used for lipidomics

| LIPID STANDARD                  | Catalog No. | SOURCE                   | Amount added to extract (pmol) |
|---------------------------------|-------------|--------------------------|--------------------------------|
| CerPE-C12 Sphingosyl PE [d17:1] | 110753      | Avanti Polar Lipids, USA | 7.96                           |
| PC [17:0-14:1]                  | LM-1004     |                          | 4.43                           |
| PE [17:1-14:0]                  | LM1104      |                          | 4.29                           |
| C17-Cer [d18:1/17:0]            | 860517P     |                          | 10.41                          |
| PE-OO [40:00]                   | 999985P     |                          | 7.16                           |
| Sphingosine [d17:1]             | LM-2000     |                          | 7.1                            |
| PI [17:0-14:1]                  | LM-1504     |                          | 3.72                           |
| GluCer[d18:1/12:0]              | 860543P     |                          | 7.89                           |
| PS [17:0-14:1]                  | LM-11304    |                          | 2.95                           |
